# Supplementary material for: Bifunctional structure modulation of Sb-based sulfide for boosting fast and high-capacity sodium storage
Source: Royal Society of Chemistry journal article supplement (doi:10.1039/d3qi00173c), 2023-01-01
Supplement: d3qi00173c1.pdf [file d3qi00173c1.pdf]

## Support information

### **Bifunctional Structure Modulation of Sb-Based Sulfide for Boosting Fast and Large Sodium Storage**

*Yusha Gao<sup>a, b#</sup>, Baixin Peng<sup>a, b#</sup>, Zhuoran Lv<sup>a, b</sup>, Zhen Han<sup>a\*</sup>, Keyan Hu<sup>d\*</sup>, Fuqiang Huang<sup>a, c\*</sup>*

*<sup>a</sup> State Key Laboratory of High Performance Ceramics and Superfine Microstructure, Shanghai Institute of Ceramics, Chinese Academy of Sciences, Shanghai 200050, China*

*<sup>b</sup> Center of Materials Science and Optoelectronics Engineering, University of Chinese Academy of Sciences, Beijing 100049, China*

*<sup>c</sup> Beijing National Laboratory for Molecular Sciences and State, Key Laboratory of Rare Earth Materials Chemistry and Applications, College of Chemistry and Molecular Engineering, Peking University, Beijing 100871, China*

*<sup>d</sup> School of Mechanical and Electrical Engineering, Jingdezhen Ceramic Institute, Jingdezhen 333403, China.*

*\* Corresponding author.*

*# These authors contributed equally to this work.*

E-mail: hanzhen@mail.sic.ac.cn, hukeyan@jci.edu.cn, huangfq@mail.sic.ac.cn

## Experimental section

- *Preparation of CrSbS<sub>3</sub> and Sb<sub>2</sub>S<sub>3</sub>-C*

CrSbS<sub>3</sub> was synthesized through solid state reaction. 1 mmol Cr (99.999%, Alfa Aesar Puratronic), 1 mmol Sb (99.999%, Alfa Aesar Puratronic), 3 mmol S were mixed uniformly and loaded in pre-evacuated quartz tube. Then the tube was kept at 650 °C for 12 h and cooled down to room temperature to obtain the rod like sample. Sb<sub>2</sub>S<sub>3</sub>-C was synthesized through high-energy ball milling of Sb<sub>2</sub>S<sub>3</sub> (99.999%, Alfa Aesar Puratronic) and graphene (weight ratio: 7:3).

- *Material Characterization*

X-ray diffraction patterns of CrSbS<sub>3</sub> samples were collected on a Bruker D8 Advance diffractometer equipped with mirror-monochromatic Cu K $\alpha$  radiation ( $\lambda = 0.15406$  nm). The XRD patterns were collected at a scan rate of 2° min<sup>-1</sup> with  $2\theta$  from 5° to 80°. Simulated patterns were calculated through the mercury program and CIF file downloaded from the ICSD. The *in-situ* XRD measurement was conducted on a live discharge/charge process in a cell purchased from Beijing Scistar Technology Co. Ltd. The morphology was investigated by a JEOL (JSM6510) scanning electron microscope equipped with energy dispersive X-ray spectroscopy (EDXS, Oxford Instruments) and aberration-corrected field transmission electron microscopy (FEI Tecnai F20, USA). Temperature dependent conductivity was obtained from standard four-probe technique with the resistivity model and collected on physical properties measurement system (PPMS, Quantum Design). For the electric property tests, powders of CrSbS<sub>3</sub> were

pressed into square disc, and silver paste was used as the contact electrode. Raman spectroscopy was conducted on a Jobin-Yvon LabRAM HR-800 spectrometer with a laser excitation at 532 nm. The surface chemistry was probed by X-ray photoelectron spectrometer (XPS, Thermo Scientific, ESCALAB 250, USA).

- *Electrochemical Characterization*

The electrodes were prepared through mixing the active materials powder (70 wt%), Super P (20 wt%) and Carboxymethylcellulose sodium (CMC-Na) binder (10 wt%) homogeneously in deionized water to get a slurry. Then the slurry was coated evenly on a copper foil using a blade with mass loading of  $\approx 0.7\text{--}1.2\text{ mg cm}^{-2}$ . The electrode was then dried at 80 °C for 8 h before final assembling. The half cells were assembled in coin-type cells (MTI corporation-CR2032) within an Ar filled glove box. A piece of sodium was employed as counter electrode. The electrolyte is composed of 1 M NaPF<sub>6</sub> in Diglyme solution. Glass fiber is used as a separator. For the full battery, cathode was developed by mixing Na<sub>0.44</sub>MnO<sub>2</sub>(80 wt%), Super P (10 wt%) and polyvinylidene fluoride (PVDF) binder (10 wt%) homogeneously in N-methyl pyrrolidinone (NMP) solvent to get a slurry. Then the slurry was coated evenly on an aluminum foil. The anode was made through the same process for half-cell. The N:P ratio of full cell and the area of the electrodes were 1.05: 1 and 1.1 cm<sup>2</sup>. A Land CT2001A tester (Wuhan, China) was applied to get the galvanostatic cycling performance of the assembled cells with a cutoff voltage between 2.5 V and 0.01 V at room temperature. A CHI1760e electrochemical workstation was applied for the cyclic voltammetry tests with a potential range between 2.5 V and 0.01 V at different scan rates.

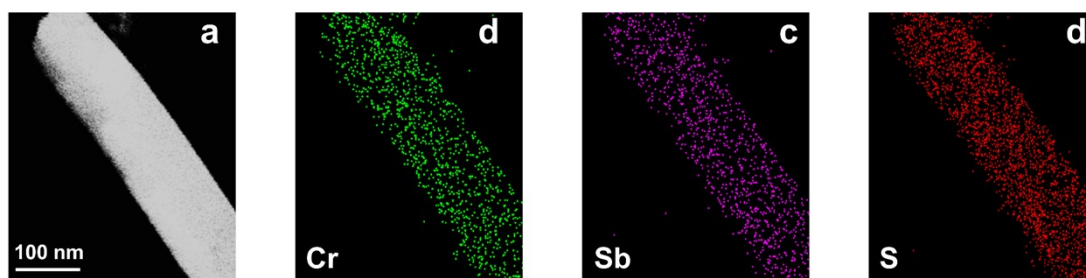

**Figure S1.** a) HAADF-STEM image of  $\text{CrSbS}_3$  and b-d) EDX mapping of Cr, Sb and S elements

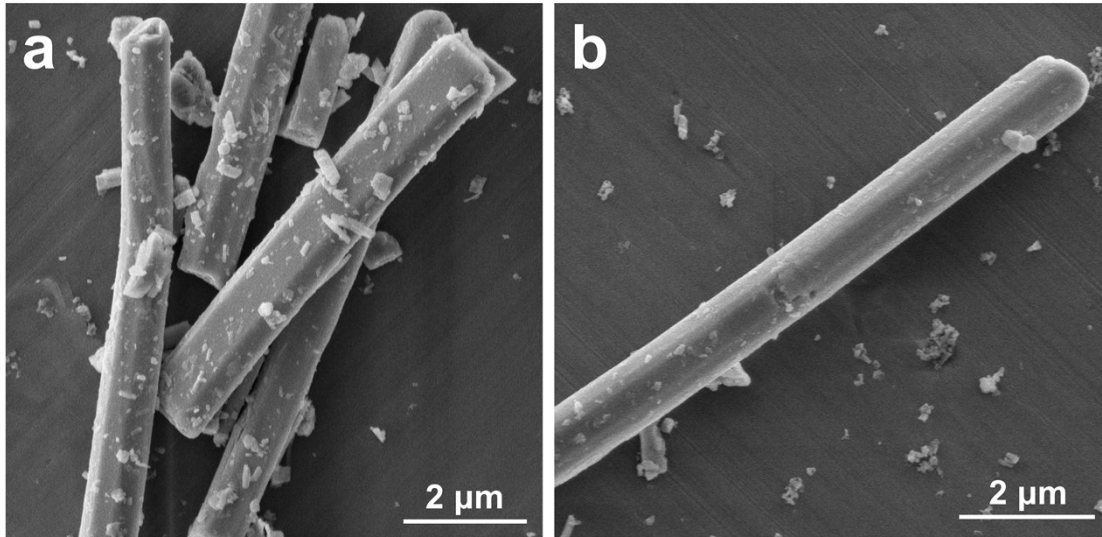

**Figure S2.** SEM images of CrSbS<sub>3</sub>.

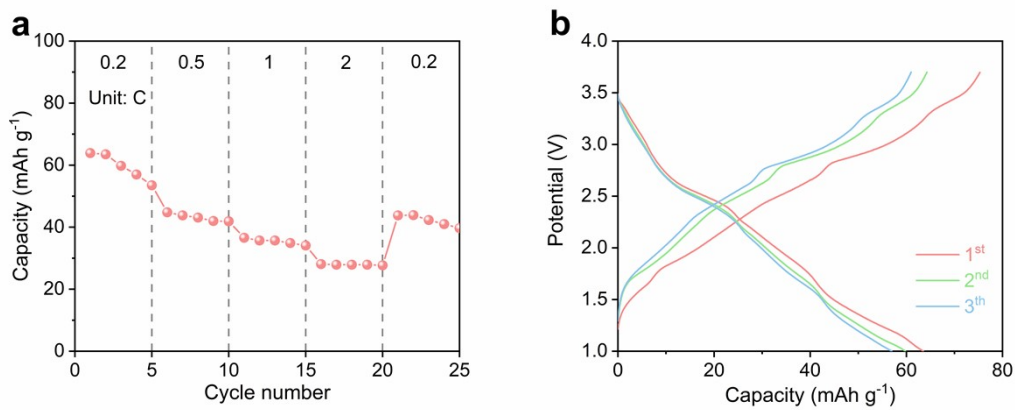

**Figure S3.** Electrochemical performances of CrSbS<sub>3</sub>//Na<sub>0.44</sub>MnO<sub>2</sub> full cells. (a) rate capability at various current densities. (b) galvanostatic discharge/charge curves of the initial three cycles.

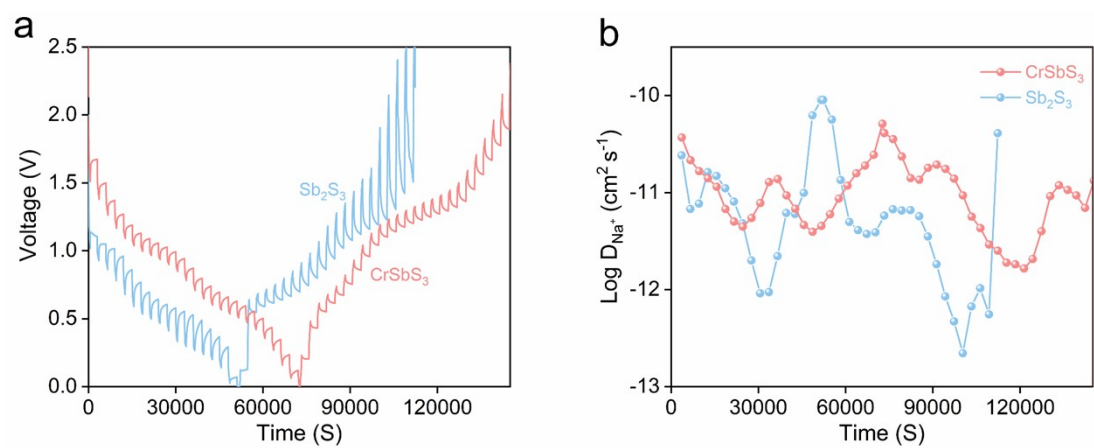

**Figure S4.** (a) GITT potential profiles in the second cycle. (b) Diffusion coefficients of Na<sup>+</sup> calculated from the GITT tests for CrSbS<sub>3</sub> and Sb<sub>2</sub>S<sub>3</sub>.

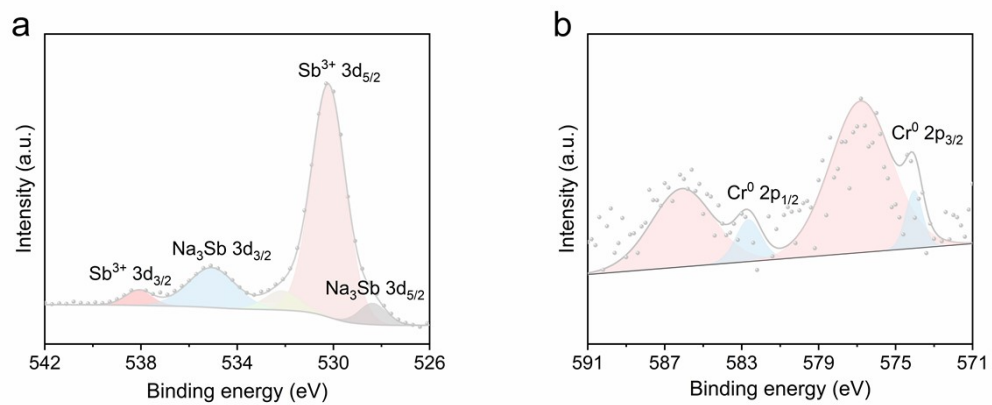

**Figure S5.** High-resolution XPS spectra of (a) Sb 3d and (b) Cr 2p after discharging into 0.01 V



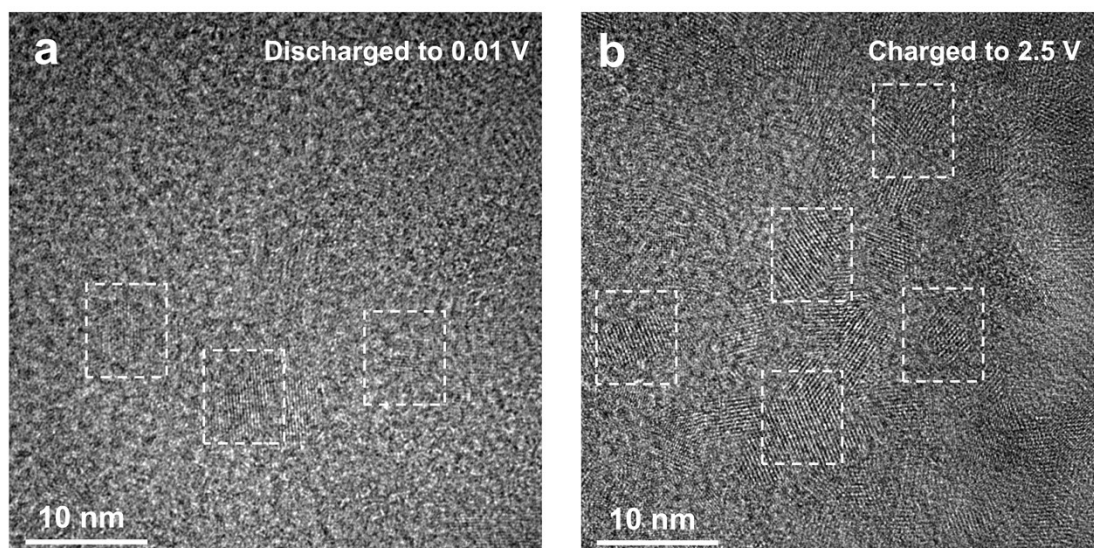

**Figure S6.** Ex situ HRTEM images of CrSbS<sub>3</sub> (a) after discharge at 0.01 V and (b) recharge at 2.5 V.
